# Supplementary material for: Anchoring and activation of catalytic sites on the clusters via intermolecular interactions
Source: Royal Society of Chemistry journal article supplement (doi:10.1039/d6sc00514d), 2026-04-20
Supplement: d6sc00514d1.pdf [file d6sc00514d1.pdf]

## Supporting Information

### **Anchoring and activation of catalytic sites on the clusters via intermolecular interactions**

Feng Qian,<sup>a,‡</sup> Zhihang Zhao,<sup>a,‡</sup> Baoyu Huang,<sup>b,‡</sup> Zhixiang Xue,<sup>a</sup> Qinzhen Li,<sup>a</sup> Sha Yang,<sup>a</sup> Jinsong Chai<sup>a,\*</sup> and Manzhou Zhu<sup>a,\*</sup>

<sup>a</sup> School of Materials Science and Engineering and Centre for Atomic Engineering of Advanced Materials, Key Laboratory of Structure and Functional Regulation of Hybrid Materials of Ministry of Education, Anhui Province Key Laboratory of Chemistry for Inorganic/Organic Hybrid Functionalized Materials, Anhui University, Hefei, Anhui 230601, China.

\*E-mail: [chaijs@ahu.edu.cn](mailto:chaijs@ahu.edu.cn); [zmz@ahu.edu.cn](mailto:zmz@ahu.edu.cn)

<sup>b</sup> Department Hunan Provincial Key Laboratory of Environmental Catalysis & Waste Recycling, College of Materials and Chemical Engineering, Hunan Institute of Engineering, 411104 Xiangtan, China

‡ These authors contributed equally to this work.

## Experimental Procedures

### Materials.

All reagents were commercially available and used without further purification.  $\text{HAuCl}_4 \cdot 4\text{H}_2\text{O}$  ( $\geq 99.99\%$ , metals basis) was purchased from China Nonferrous Metal Mining (Group) Co., Ltd. (Shenyang, China), and  $\text{CdCl}_2 \cdot 2.5\text{H}_2\text{O}$  was purchased from Sigma-Aldrich (Shanghai, China). 1-Adamantanethiol (HS-Adm,  $\geq 98\%$ ), 3,5-dimethyl-1-adamantanethiol (DM-SAdm,  $\geq 95\%$ ), 4-Methoxythiophenol (4-MBT,  $\geq 98\%$ ), Diphenyl-2-pyridylphosphine ( $\text{PPh}_2\text{Py}$ ,  $\geq 98\%$ ), (oxydi-2,1-phenylene)bis(diphenylphosphine) (OPDP,  $\geq 98\%$ ), D-penicillamine (DPA,  $\geq 98\%$ ), borane-tert-butylamine complex ( $\geq 95\%$ ) were purchased from Shanghai Macklin Biochemical Co., Ltd., and sodium borohydride ( $\text{NaBH}_4$ ,  $\geq 98\%$ ) were purchased from Shanghai Aladdin Bio-Chem Technology Co., Ltd. Solvents, including dichloromethane (DCM), methanol (MeOH), ethanol (EtOH), n-hexane (n-Hex), toluene (Tol), acetonitrile (MeCN) were HPLC grade. The ultrapure water ( $\geq 18.2 \text{ M}\Omega$ ) used in this work was purified on a Millipore system (Millipore).

### Measurements.

The TEM images were obtained by using a transmission electron microscope (JEM ARM-200F, JEOL). The crystal structures were analyzed by using an XRD (Smart Lab 9 kW, Japan) with Cu  $K\alpha$  radiation ( $\lambda = 0.15418 \text{ nm}$ ). UV-vis absorption spectra were recorded on an Agilent 8453 spectrophotometer. XPS measurements were performed on a thermal ESCALAB 250. ESI-MS were recorded using a Waters Xevo G2-XS mass spectrometer. The ORR electrochemical measurements were also performed on a CHI700E electrochemical workstation at room temperature.

### Synthesis of $\text{Au}_{27}\text{Cd}_2(\text{S-Adm})_{16}(\text{PPh}_2\text{Py})\text{Cl}$ .

First, 20 mg of  $\text{CdCl}_2 \cdot 2.5\text{H}_2\text{O}$  and 400  $\mu\text{L}$   $\text{HAuCl}_4 \cdot 4\text{H}_2\text{O}$  (0.2 g/mL in water) were dissolved in a mixed solvent (10 mL of EtOH and 10 mL of DCM). Then, 100 mg of HSAdm was added. After the color of the mixed solution turned light yellow, 5 mg of  $\text{PPh}_2\text{Py}$  was added. The mixed solution was stirred until it was transparent and colourless, and 120 mg of the borane-tert-butylamine complex was added. The mixture was stirred for 12 hours and washed with methanol several times. Dissolve the crude product with a small amount of DCM and add 5 mL TOL. Then, 60 mg of HS-Adm and 3 mg  $\text{CdCl}_2 \cdot 2.5\text{H}_2\text{O}$  were added, and the reaction was stirred slowly at 60 °C for 12 hours. The insoluble precipitate in the crude product was removed by centrifugation, and the raw product was repeatedly washed with methanol. By TLC (DCM:n-Hex = 5:1, v:v),  $\text{Au}_{27}\text{Cd}_2$  was extracted from the crude product. The pure  $\text{Au}_{27}\text{Cd}_2$  was crystallized with chloroform/ethanol to obtain high-quality single crystals. The yield is 3.6% based on Au atoms.

### Synthesis of $\text{Au}_{16}\text{Cd}_3(\text{S-Adm})_9(\text{PPh}_2\text{Py})_3\text{Cl}_3$ .

First, 30 mg of  $\text{CdCl}_2 \cdot 2.5\text{H}_2\text{O}$  and 400  $\mu\text{L}$   $\text{HAuCl}_4 \cdot 4\text{H}_2\text{O}$  (0.2 g/mL in water) were dissolved in a mixed solvent (5 mL of EtOH and 15 mL of DCM). Then, 110 mg of HSAdm was added. After 15 minutes, 15 mg of  $\text{PPh}_2\text{Py}$  was added to the above solution. The mixed solution was stirred until it was transparent and colorless, and 120 mg of borane tert-butylamine complex was added. The mixture was stirred for 12 hours and washed with methanol several times. Second, the raw product was dissolved in 2 mL of DCM and 3 mL of Tol. Then, 60 mg of HS-Adm was added, and the reaction was stirred continuously and slowly at 60 °C for 12 hours.

The insoluble precipitate in the crude product was removed by centrifugation, and the raw product was repeatedly washed with methanol. By TLC (DCM:n-Hex = 5:1, v:v), Au<sub>16</sub>Cd<sub>3</sub> was extracted from the crude product. The pure Au<sub>16</sub>Cd<sub>3</sub> was crystallized with chloroform/ethanol to obtain high-quality single crystals. The yield is 5.2% based on Au atoms.

**Synthesis of Au<sub>19</sub>Cd<sub>3</sub>(4-MBT)<sub>18</sub>, Au<sub>23</sub>Cd<sub>1</sub>(SAdm)<sub>14</sub>(OPDP)Cl, Au<sub>24</sub>Cd<sub>1</sub>(DM-SAdm)<sub>13</sub>(DPPF)Cl and Au<sub>30</sub>Cd<sub>1</sub>(DM-SAdm)<sub>18</sub>.**

Au<sub>19</sub>Cd<sub>3</sub>(4-MBT)<sub>18</sub>, Au<sub>23</sub>Cd<sub>1</sub>(SAdm)<sub>14</sub>(OPDP)Cl, Au<sub>24</sub>Cd<sub>1</sub>(DM-SAdm)<sub>13</sub>(DPPF)Cl and Au<sub>30</sub>Cd<sub>1</sub>(DM-SAdm)<sub>18</sub> was synthesized using the reported method.<sup>1-2</sup>

**Synthesis of Au<sub>16</sub>(S-Adm)<sub>12</sub>, Au<sub>21</sub>(S-Adm)<sub>15</sub> and Au<sub>24</sub>(S-Adm)<sub>16</sub>.**

Au<sub>16</sub>(S-Adm)<sub>12</sub>, Au<sub>21</sub>(S-Adm)<sub>15</sub> and Au<sub>24</sub>(S-Adm)<sub>16</sub> was synthesized using the reported method.<sup>3-5</sup>

**Preparation of electrocatalysts of nanoclusters.**

50 mg of activated carbon was dispersed in 5 mL of dichloromethane, followed by the addition of 5 mg of clusters or complexes. The mixture was stirred for five hours, and the catalyst was obtained by centrifugation and dried in an oven for treatment. The nanoclusters are stable before and after electrocatalytic ORR.

**Preparation of pyridine modified nanoclusters electrocatalysts.**

50 mg of activated carbon was dispersed in 5 mL of dichloromethane, followed by the addition of 5 mg of clusters or complexes. 50 μL pyridine was added and stirred for 5 h, and the catalyst was centrifuged and dried in oven.

**The Current-Time (IT) tests of nanocluster electrocatalysts and XPS characterization of Au<sub>27</sub>Cd<sub>2</sub>@C.**

**IT:** Take 2 mg of the prepared electrocatalyst into an Erlenmeyer flask, add 1 mL of isopropyl alcohol and sonicate for 20 minutes. Then add 20 μL of Nafion and sonicate for another 10 minutes. Finally, take 20 μL of the solution and drop-coat it onto the carbon paper. Use 0.1 mol/L KOH as the electrolyte, and perform electrolysis at -1.4 V for 24 hours.

**XPS:** After the reaction, place the catalyst in the oven and dry it at 40 °C for 5 hours. Take 2 milligrams of the catalyst both before and after the reaction for XPS characterization.

**Computational method and details.**

The DFT calculations were performed with the Vienna Ab initio Simulation Package (VASP 5.4.1).<sup>6</sup> The projector augmented wave (PAW) method<sup>7</sup> with a generalized gradient approximation based on the Perdew–Burke–Erzerhof (PBE) exchange correlation functional is adopted.<sup>8</sup> The DFT-D3 method proposed by Grimme is applied to depict the van der Waals interactions.<sup>9</sup> The convergence criterion for the electronic structure iteration was set to be 10<sup>-4</sup> eV, and that for geometry optimization was set to be 0.01 eV/Å on force. The plane-wave cutoff energy of 500 eV was used, and cells up to 30 Å in a vacuum region along directions a, b, and c avoid interactions between adjacent layers. All calculations in this work use the implicit Poisson-Boltzmann solvent model<sup>10</sup>, and the dielectric constant is set as 80 for water.

**Supplementary Notes.**

The overall ORR could be expressed as O<sub>2</sub> + 4H<sup>+</sup> + 4e<sup>-</sup> → 2H<sub>2</sub>O, it is also summarized as the following electron steps (1) - (4) in alkaline conditions, where \* represents the active sites, and OOH\*, O\* and OH\* are adsorbed intermediates.

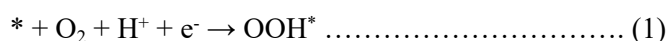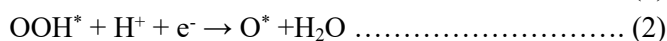

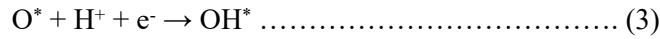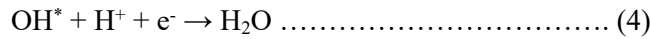

The adsorption energies ( $\Delta E$ ) of oxygenated intermediates on  $\text{Au}_{27}\text{Cd}_2$  nanostructures were calculated by

$$\Delta E_{\text{OOH}^*} = E_{\text{OOH}^*} - E^* - (2E_{\text{H}_2\text{O}} - 3/2E_{\text{H}_2}) \dots\dots\dots (5)$$

$$\Delta E_{\text{O}^*} = E_{\text{O}^*} - E^* - (E_{\text{H}_2\text{O}} - E_{\text{H}_2}) \dots\dots\dots (6)$$

$$\Delta E_{\text{OH}^*} = E_{\text{OH}^*} - E^* - (E_{\text{H}_2\text{O}} - 1/2E_{\text{H}_2}) \dots\dots\dots (7)$$

in which  $E^*$ ,  $E_{\text{OOH}^*}$ ,  $E_{\text{O}^*}$  and  $E_{\text{OH}^*}$  are the electronic energies of a clean surface and surfaces adsorbed with  $\text{OOH}^*$ ,  $\text{O}^*$  and  $\text{OH}^*$ , respectively.  $E_{\text{H}_2\text{O}}$  and  $E_{\text{H}_2}$  are the calculated DFT energies of  $\text{H}_2\text{O}$  and  $\text{H}_2$  molecules in the gas phase using the approaches outlined by Nørskov et al.<sup>11</sup>

Then the adsorption free energies ( $\Delta G_{\text{ads}}$ ) can be obtained by the zero-point energy (ZPE) and the entropy (TS) corrections in equation (8):

$$\Delta G_{\text{ads}} = \Delta E + \Delta \text{ZPE} - T\Delta S \dots\dots\dots (8)$$

Where the  $\Delta \text{ZPE}$  and  $\Delta S$  could be obtained from the calculation of vibrational frequencies for the adsorbed species (only adsorbed species are relaxed, and the catalyst is fixed),  $T$  is temperature (298.15 K). The ZPE and TS and DFT energies ( $E$ ) to the free energies. The change in Gibbs free energy ( $\Delta G$ ) during the chemical reaction can be calculated by

$$\Delta G = \Delta G_{\text{ads}} + \Delta G_{\text{U}} + \Delta G_{\text{pH}} \dots\dots\dots (9)$$

in which  $\Delta G_{\text{U}} = -neU$ , where  $U$  is the potential at the electrode, and  $n$  is the number of transferred charge,  $\Delta G_{\text{pH}}$  is the correction of the free energy under any pH value calculated by

$$\Delta G_{\text{pH}} = -KT \ln[\text{H}^+] = -KT \ln 10 * \text{pH} \dots\dots\dots (10)$$

where the pH value is chosen to be 14 in our DFT calculations. The step with the smallest decrease is the potential-determining step (PDS), and its free energy change is  $\Delta G^{\text{min}}$ . The theoretical overpotential ( $\eta$ ) of ORR is given by

$$\eta^{\text{ORR}} = 1.23 - \Delta G^{\text{min}}/e \dots\dots\dots (11)$$

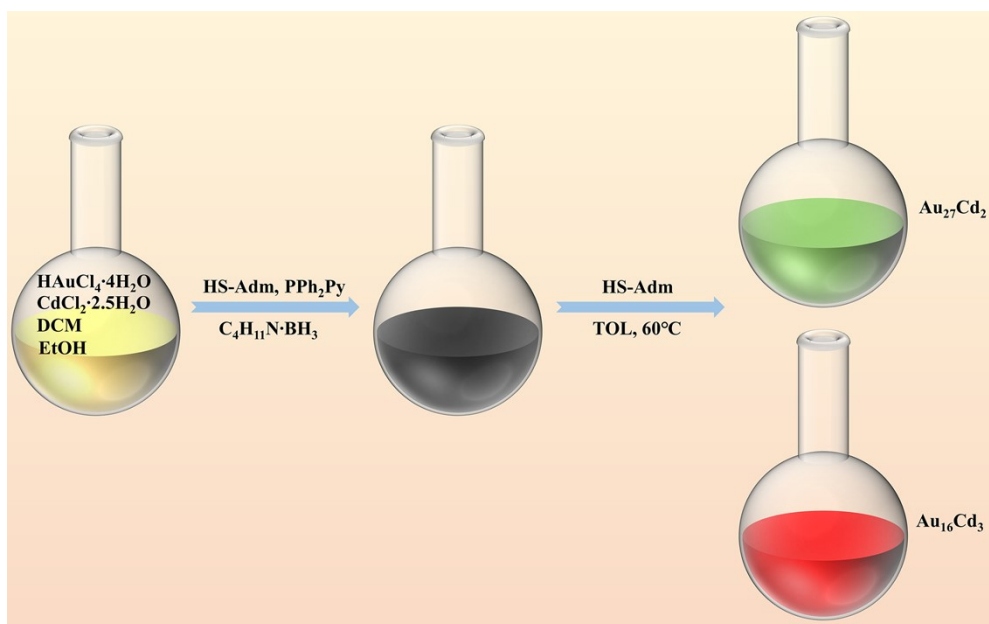

**Fig. S1** The synthesis routes of Au<sub>27</sub>Cd<sub>2</sub> and Au<sub>16</sub>Cd<sub>3</sub> clusters.

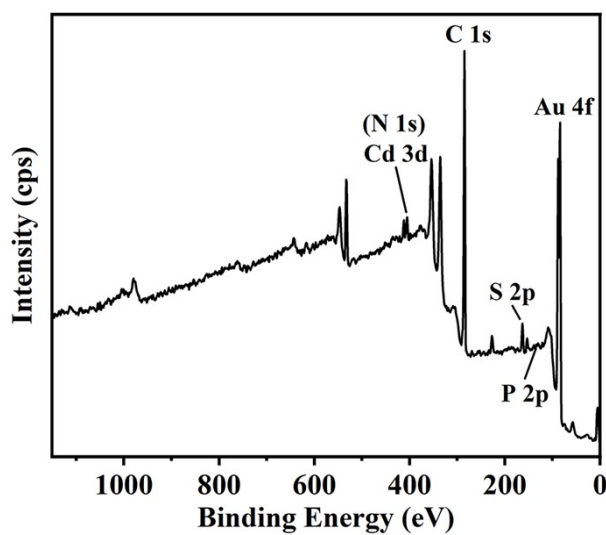

**Fig. S2** The XPS spectrum of Au<sub>27</sub>Cd<sub>2</sub>.

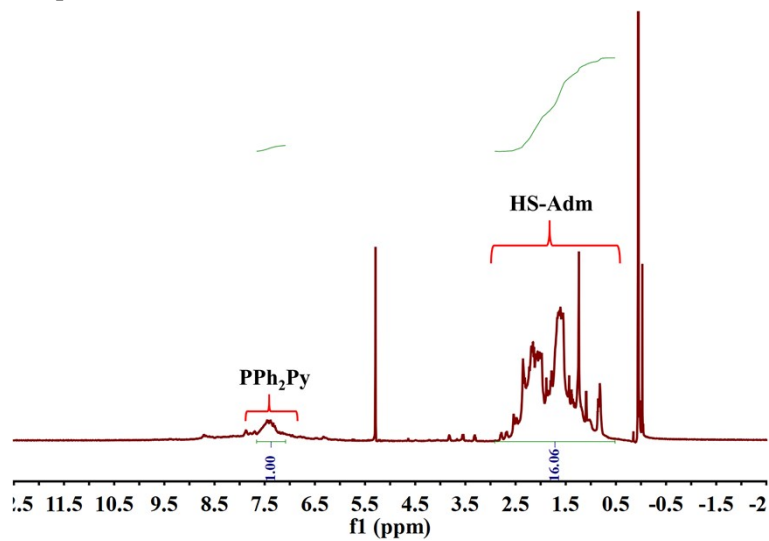

**Fig. S3** <sup>1</sup>H NMR spectrum of the Au<sub>27</sub>Cd<sub>2</sub> cluster.

**Table S1.** Crystal data and structure refinement for Au<sub>27</sub>Cd<sub>2</sub>.

|                                             |                                                                                         |
|---------------------------------------------|-----------------------------------------------------------------------------------------|
| CCDC code                                   | 2381499                                                                                 |
| Empirical formula                           | C <sub>177</sub> H <sub>254</sub> Au <sub>27</sub> Cd <sub>2</sub> S <sub>16</sub> ClNP |
| Formula weight                              | 8518.07                                                                                 |
| Temperature/K                               | 120.0                                                                                   |
| Crystal system                              | monoclinic                                                                              |
| Space group                                 | P2 <sub>1</sub> /n                                                                      |
| a/Å                                         | 17.3748(3)                                                                              |
| b/Å                                         | 32.3965(4)                                                                              |
| c/Å                                         | 38.6842(6)                                                                              |
| α/°                                         | 90                                                                                      |
| β/°                                         | 97.4160(10)                                                                             |
| γ/°                                         | 90                                                                                      |
| Volume/Å <sup>3</sup>                       | 21592.5(6)                                                                              |
| Z                                           | 4                                                                                       |
| ρ <sub>calc</sub> /cm <sup>3</sup>          | 2.620                                                                                   |
| μ/mm <sup>-1</sup>                          | 36.961                                                                                  |
| F(000)                                      | 15360.0                                                                                 |
| Crystal size/mm <sup>3</sup>                | 0.08 × 0.1 × 0.08                                                                       |
| Radiation                                   | CuKα (λ = 1.54186)                                                                      |
| 2θ range for data collection/°              | 5.888 to 131.996                                                                        |
| Index ranges                                | -13 ≤ h ≤ 20, -38 ≤ k ≤ 37, -38 ≤ l ≤ 45                                                |
| Reflections collected                       | 87221                                                                                   |
| Independent reflections                     | 35798 [R <sub>int</sub> = 0.0825, R <sub>sigma</sub> = 0.2038]                          |
| Data/restraints/parameters                  | 35798/2406/2153                                                                         |
| Goodness-of-fit on F <sup>2</sup>           | 0.712                                                                                   |
| Final R indexes [I ≥ 2σ (I)]                | R <sub>1</sub> = 0.0488, wR <sub>2</sub> = 0.0958                                       |
| Final R indexes [all data]                  | R <sub>1</sub> = 0.0953, wR <sub>2</sub> = 0.1033                                       |
| Largest diff. peak/hole / e Å <sup>-3</sup> | 2.48/-1.47                                                                              |

**Table S2.** EA of the Au<sub>27</sub>Cd<sub>2</sub> cluster.

| Empirical formula                                                                                                                | C      | H  | N     |
|----------------------------------------------------------------------------------------------------------------------------------|--------|----|-------|
| C <sub>177</sub> H <sub>254</sub> Au <sub>27</sub> Cd <sub>2</sub> Cl <sub>1</sub> N <sub>1</sub> P <sub>1</sub> S <sub>16</sub> | 24.95% | 3% | 0.15% |

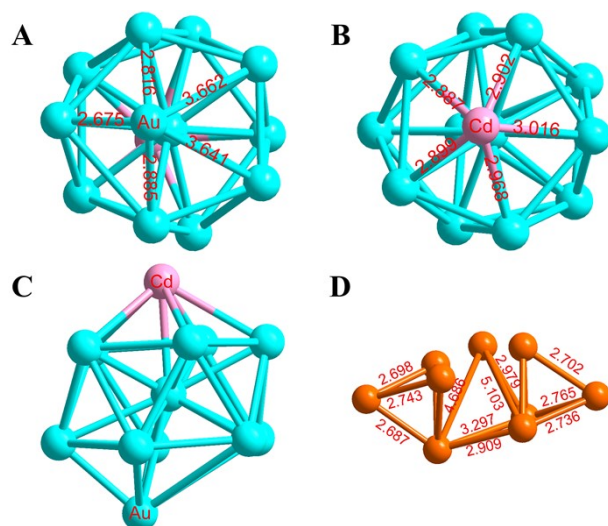

**Fig. S4** Core analysis diagram of  $\text{Au}_{27}\text{Cd}_2$ . (A) Au-Au bond length in  $\text{Au}_{12}\text{Cd}_1$  core, (B) Au-Cd bond length in  $\text{Au}_{12}\text{Cd}_1$  core, (C) distortion diagram of  $\text{Au}_{12}\text{Cd}_1$ , (D) the Au-Au bond lengths in the three tetrahedra.

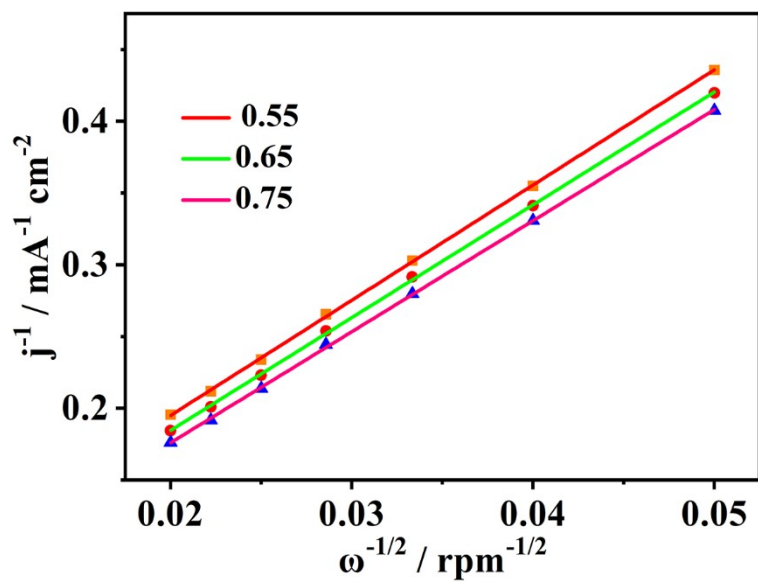

**Fig. S5** Koutecky–Levich plots of  $\text{Au}_{27}\text{Cd}_2$  catalysis at different potentials.

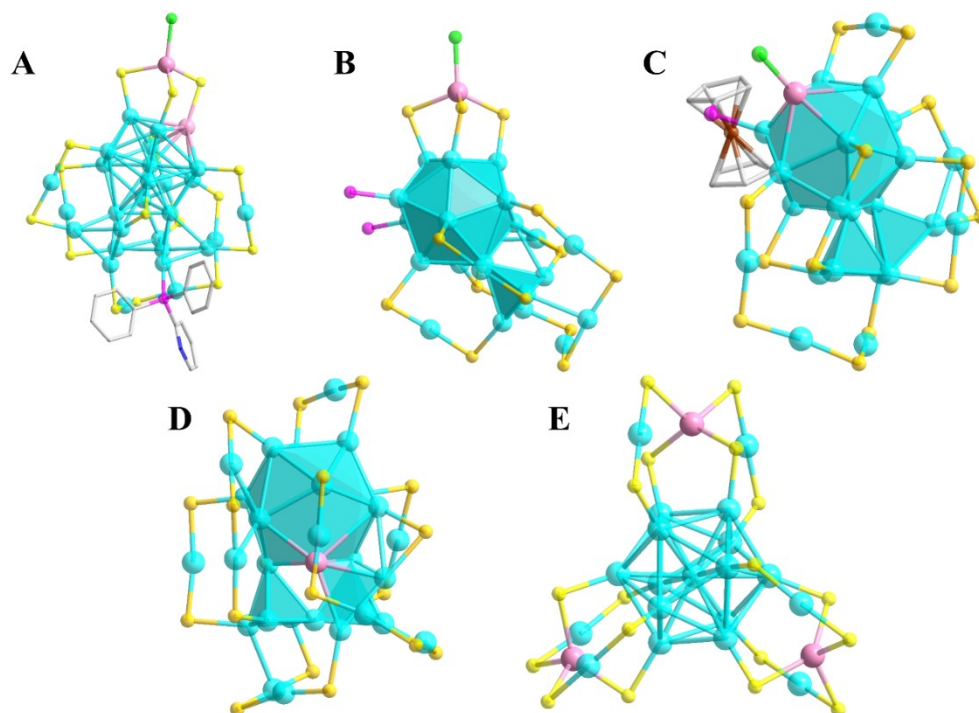

**Fig. S6** The Cd distribution in  $\text{Au}_{27}\text{Cd}_2$  (A),  $\text{Au}_{23}\text{Cd}_1$  (B),  $\text{Au}_{24}\text{Cd}_1$  (C),  $\text{Au}_{30}\text{Cd}_1$  (D) and  $\text{Au}_{19}\text{Cd}_3$  (E) (color label: orange = Au, pink = Cd, yellow = S, purple = P, bright green = Cl, blue = N, and parts of C and all H atoms were omitted for clarity).

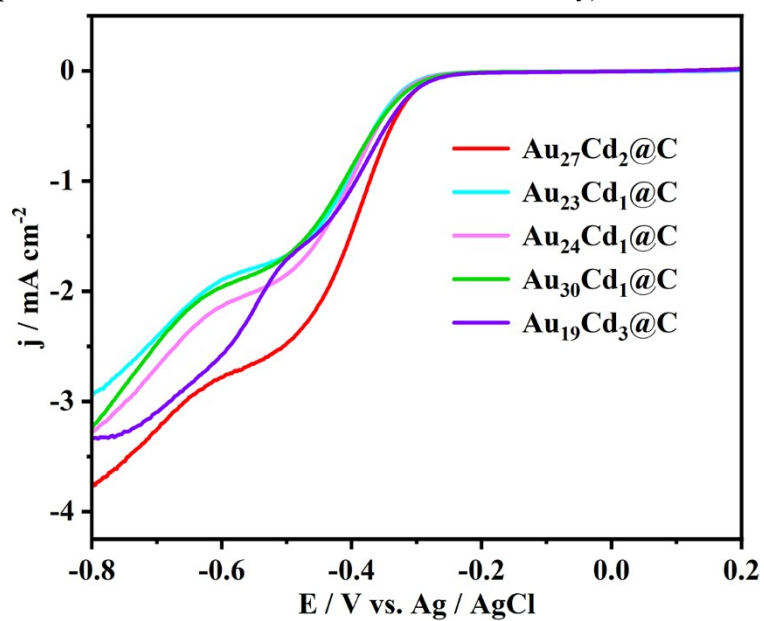

**Fig. S7** The LSV curves of the Au-Cd bimetallic catalyst at 1600 rpm.

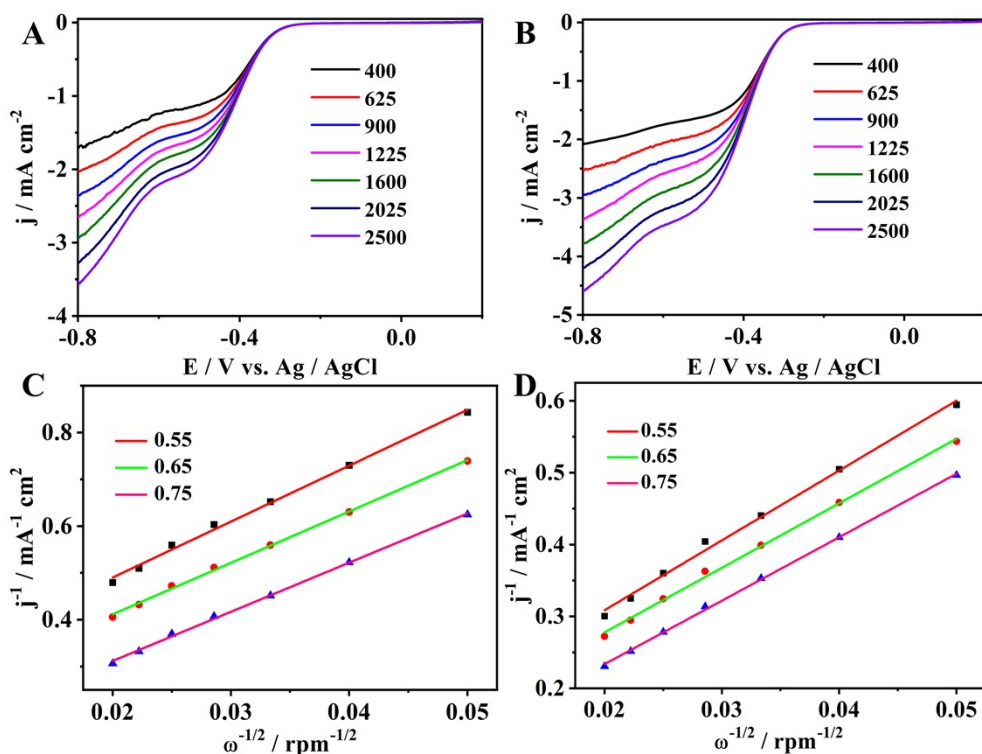

**Fig. S8** The ORR LSV curves and Koutecky–Levich plots of  $\text{Au}_{23}\text{Cd}_1$  catalysis before (A, C) and after (B, D) addition of pyridine.

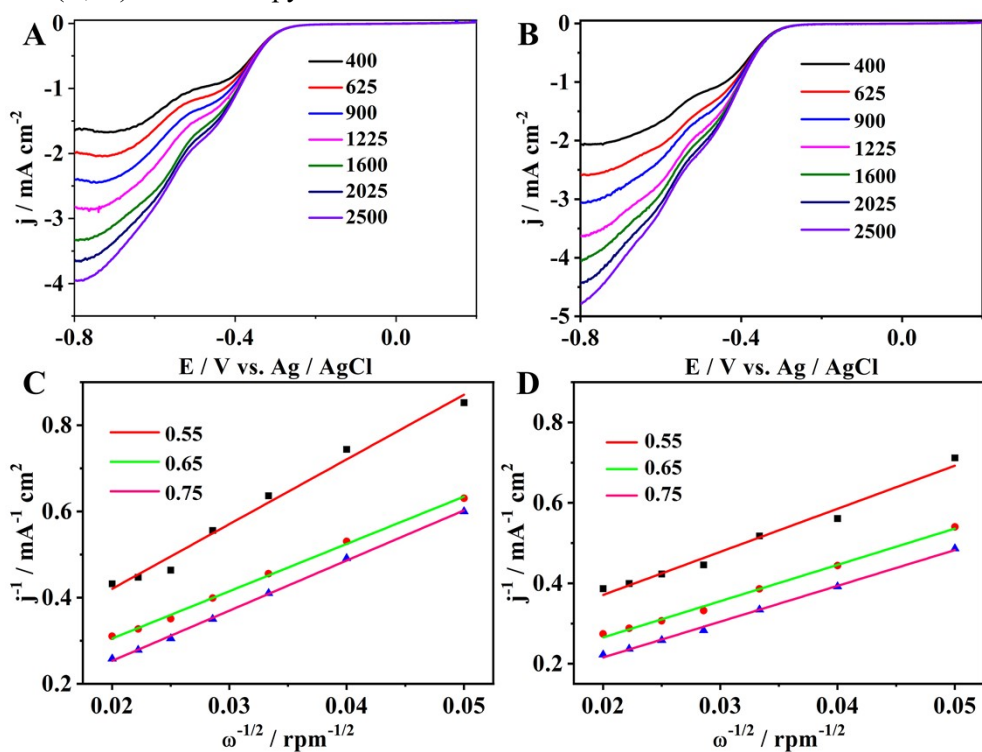

**Fig. S9** The ORR LSV curves and Koutecky–Levich plots of  $\text{Au}_{19}\text{Cd}_3$  catalysis before (A, C) and after (B, D) addition of pyridine.

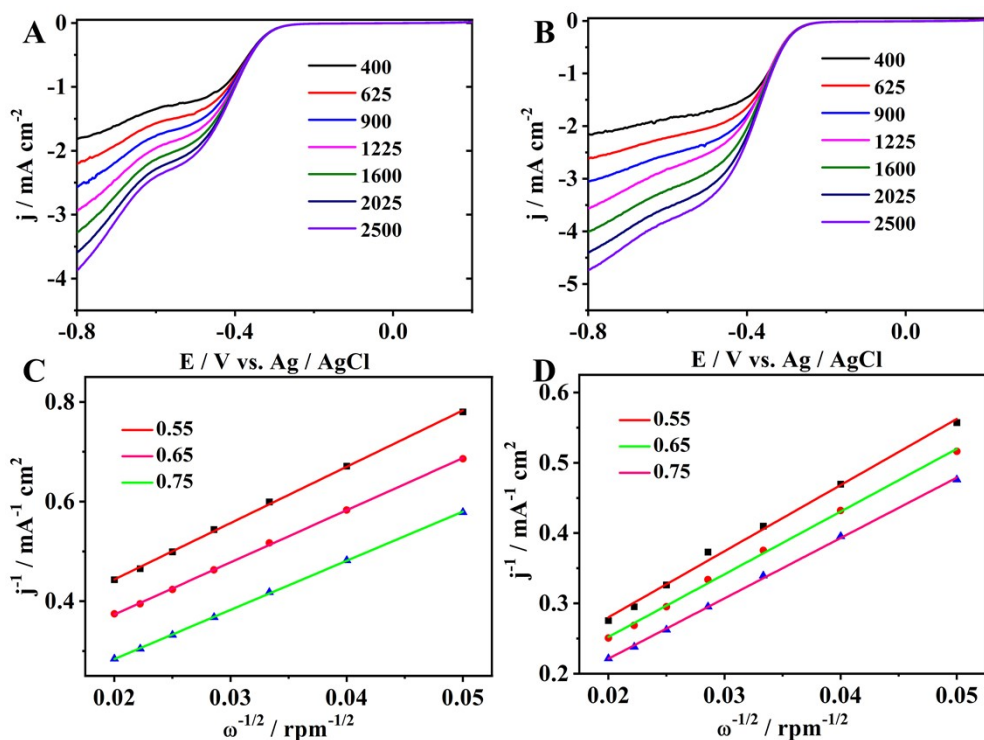

**Fig. S10** The ORR LSV curves and Koutecky–Levich plots of  $\text{Au}_{24}\text{Cd}_1$  catalysis before (A, C) and after (B, D) addition of pyridine.

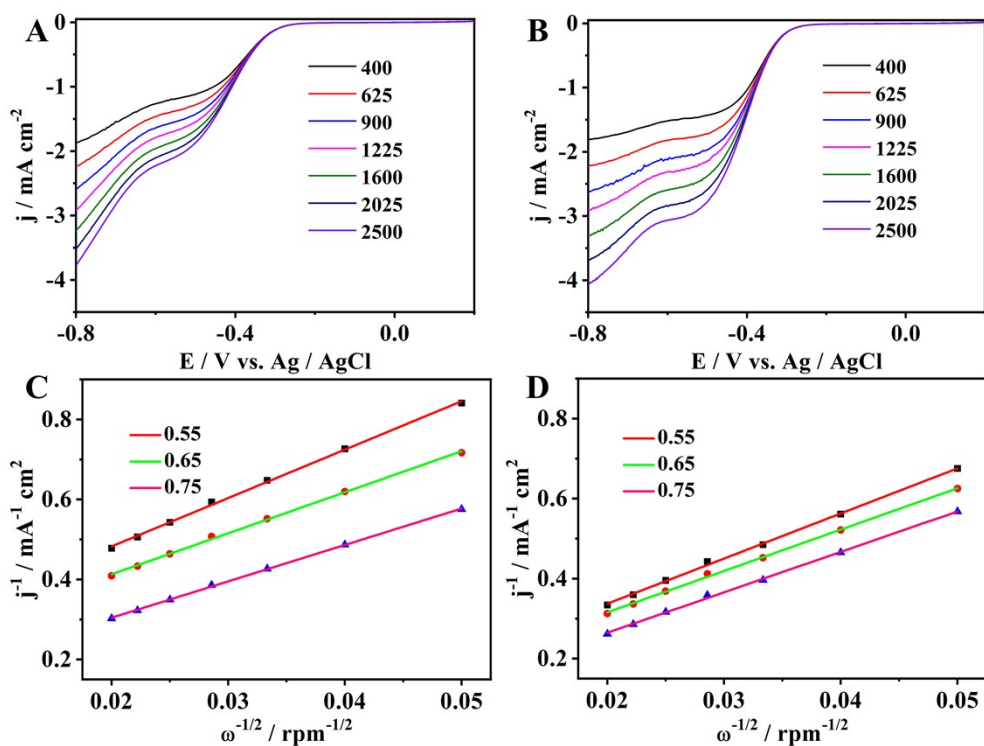

**Fig. S11** The ORR LSV curves and Koutecky–Levich plots of  $\text{Au}_{30}\text{Cd}_1$  catalysis before (A, C) and after (B, D) addition of pyridine.

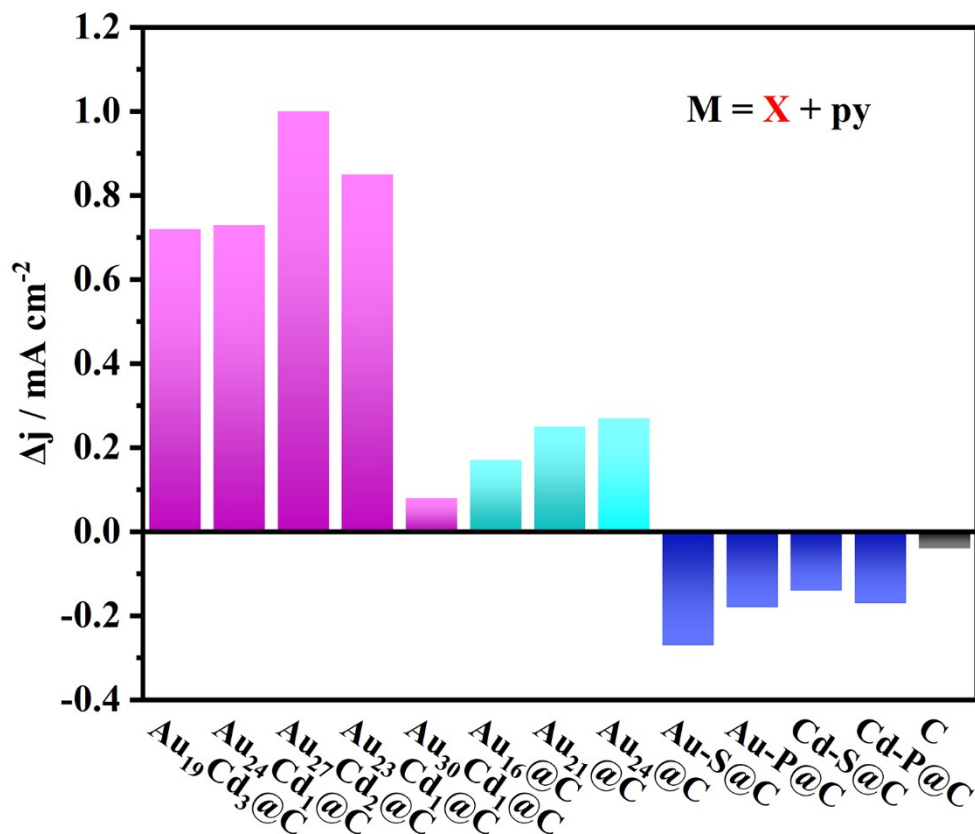

**Fig. S12** Comparison of the current densities at -0.8 V of the catalysts before and after the addition of pyridine.

**Table S3.** Performance comparison and percentage enhancement of all catalysts before and after pyridine addition.

| Catalysts                                              | Before adding pyridine (mA·cm <sup>-2</sup> ) | After adding pyridine (mA·cm <sup>-2</sup> ) | Percentage increase (%) |
|--------------------------------------------------------|-----------------------------------------------|----------------------------------------------|-------------------------|
| Au <sub>27</sub> Cd <sub>2</sub> @C                    | 3.70                                          | 4.70                                         | 27.03                   |
| Au <sub>23</sub> Cd <sub>1</sub> @C                    | 2.93                                          | 3.78                                         | 28.88                   |
| Au <sub>24</sub> Cd <sub>1</sub> @C                    | 3.27                                          | 4.00                                         | 22.32                   |
| Au <sub>19</sub> Cd <sub>3</sub> @C                    | 3.32                                          | 4.04                                         | 21.69                   |
| Au <sub>30</sub> Cd <sub>1</sub> @C                    | 3.23                                          | 3.31                                         | 2.48                    |
| Au <sub>16</sub> @C                                    | 2.48                                          | 2.65                                         | 6.85                    |
| Au <sub>21</sub> @C                                    | 2.60                                          | 2.85                                         | 9.62                    |
| Au <sub>24</sub> @C                                    | 2.63                                          | 2.90                                         | 10.27                   |
| Au-S@C                                                 | 3.19                                          | 2.92                                         | -8.46                   |
| Au-P@C                                                 | 3.00                                          | 2.82                                         | -6.00                   |
| Cd-S@C                                                 | 2.88                                          | 2.74                                         | -4.86                   |
| Cd-P@C                                                 | 2.93                                          | 2.76                                         | -5.80                   |
| C                                                      | 2.45                                          | 2.41                                         | -1.63                   |
| Au <sub>27</sub> Cd <sub>2</sub> @C-NO <sub>3</sub> RR | 41.78                                         | 61.75                                        | 47.80                   |
| Au <sub>27</sub> Cd <sub>2</sub> @C-HER                | 22.71                                         | 43.63                                        | 92.12                   |

**Table S4.** Half-wave potentials of AuCd clusters before and after adding pyridine.

| clusters                            | half-wave potential (V) |                       |
|-------------------------------------|-------------------------|-----------------------|
|                                     | Before adding pyridine  | After adding pyridine |
| Au <sub>27</sub> Cd <sub>2</sub> @C | -0.43                   | -0.37                 |
| Au <sub>16</sub> Cd <sub>3</sub> @C | -0.39                   | -0.39                 |
| Au <sub>19</sub> Cd <sub>3</sub> @C | -0.50                   | -0.50                 |
| Au <sub>23</sub> Cd <sub>1</sub> @C | -0.46                   | -0.42                 |
| Au <sub>24</sub> Cd <sub>1</sub> @C | -0.46                   | -0.40                 |
| Au <sub>30</sub> Cd <sub>1</sub> @C | -0.46                   | -0.43                 |

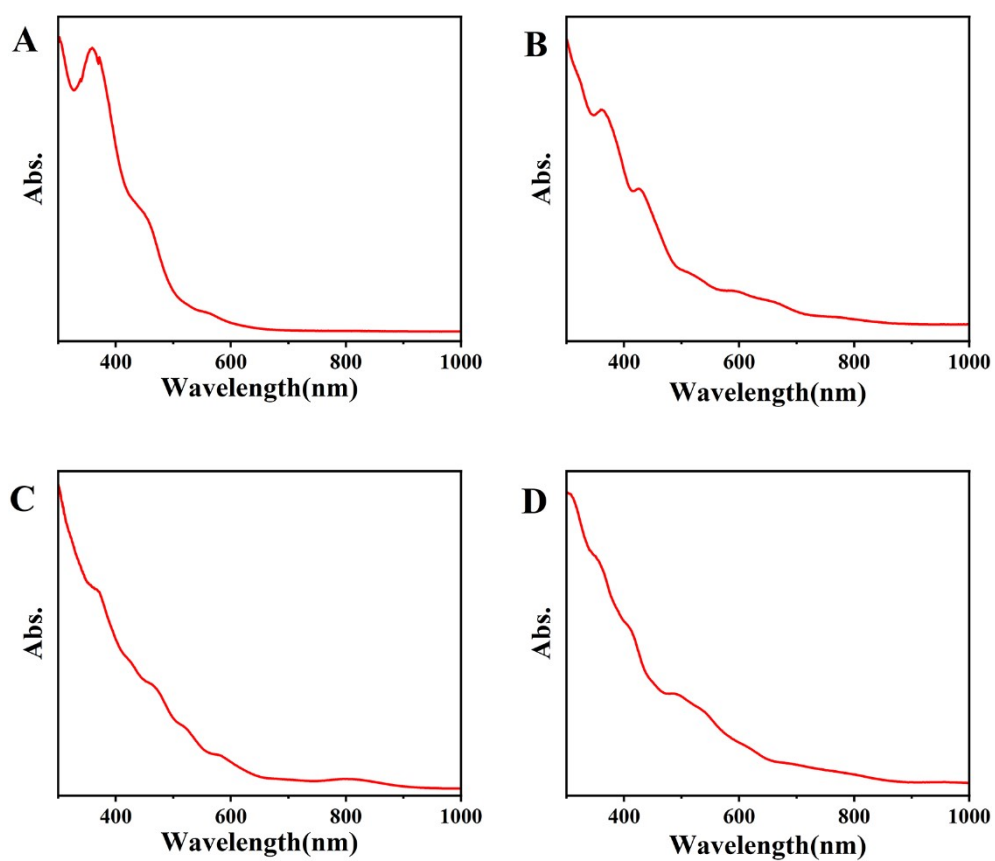

**Fig. S13** UV-vis spectra of (A) Au<sub>19</sub>Cd<sub>3</sub>, (B) Au<sub>23</sub>Cd<sub>1</sub>, (C) Au<sub>24</sub>Cd<sub>1</sub>, and (D) Au<sub>30</sub>Cd<sub>1</sub>.

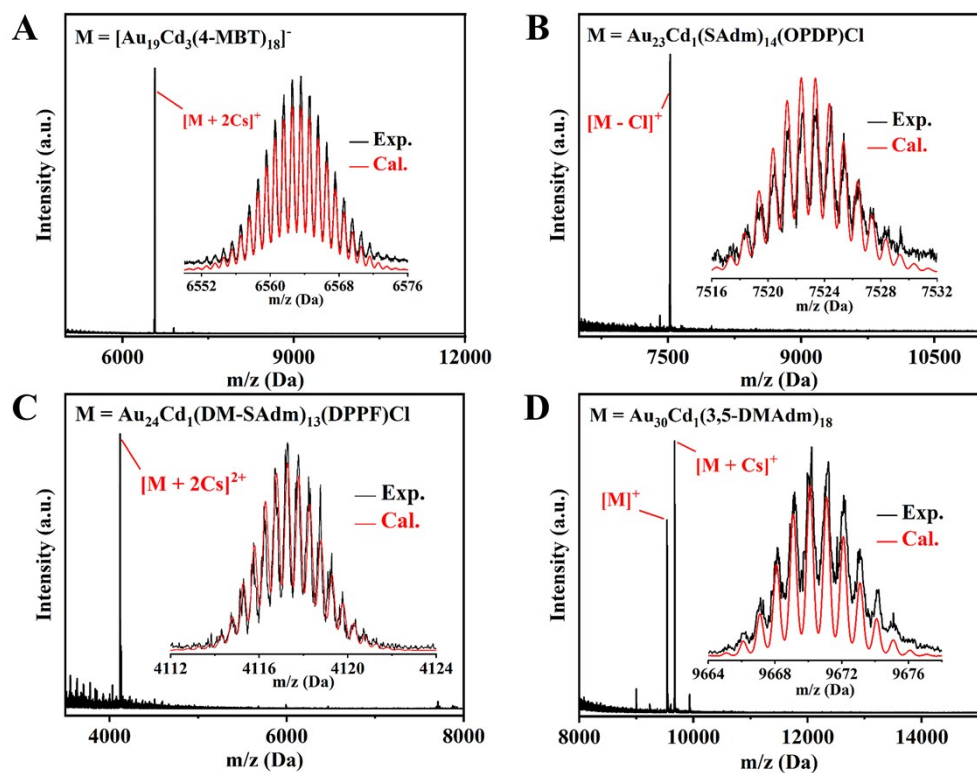

**Fig. S14** The ESI-MS spectra of  $\text{Au}_{19}\text{Cd}_3$  (A),  $\text{Au}_{23}\text{Cd}_1$  (B),  $\text{Au}_{24}\text{Cd}_1$  (C), and  $\text{Au}_{30}\text{Cd}_1$  (D).

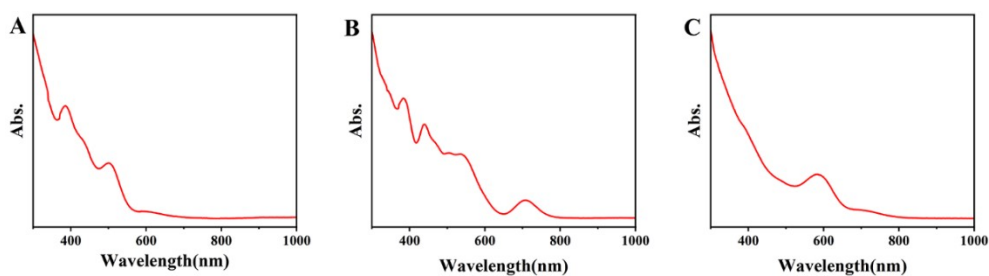

**Fig. S15** UV-vis spectra of (A)  $\text{Au}_{16}(\text{S-Adm})_{12}$ , (B)  $\text{Au}_{21}(\text{S-Adm})_{15}$ , and (C)  $\text{Au}_{24}(\text{S-Adm})_{16}$ .

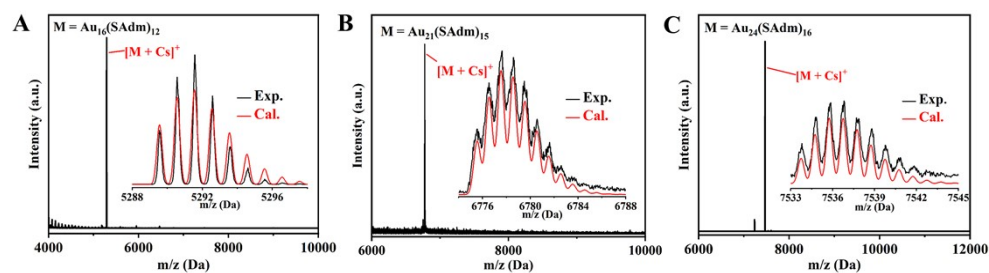

**Fig. S16** The ESI-MS spectra of  $\text{Au}_{16}$  (A),  $\text{Au}_{21}$  (B), and  $\text{Au}_{24}$  (C).

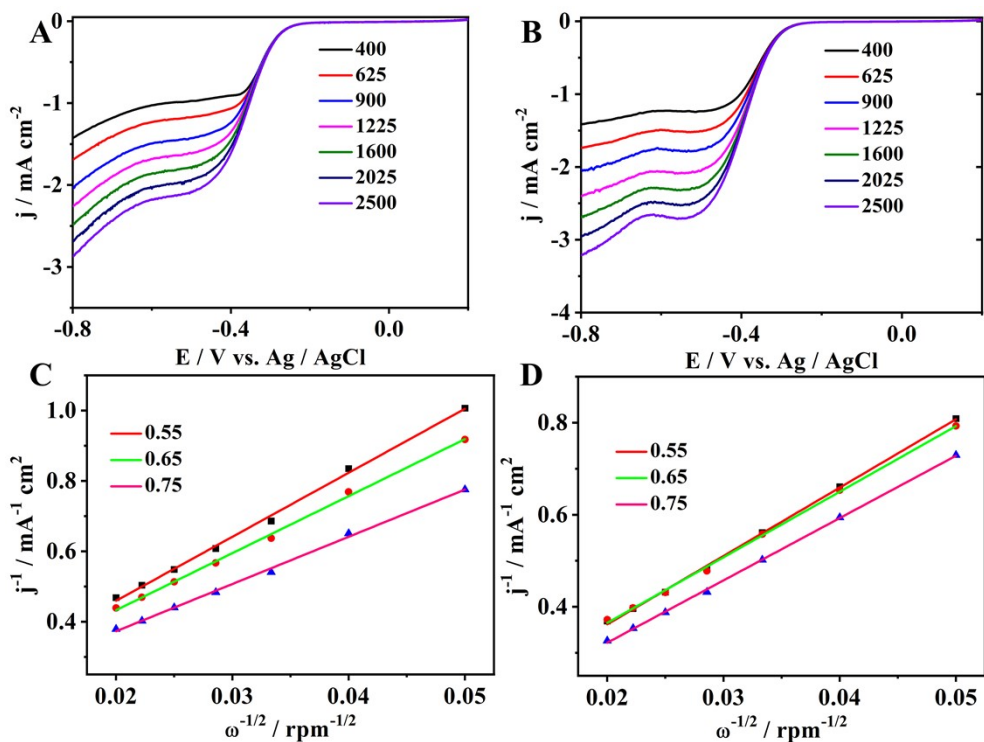

**Fig. S17** The ORR LSV curves and Koutecky–Levich plots of  $\text{Au}_{16}$  catalysis before (A, C) and after (B, D) addition of pyridine.

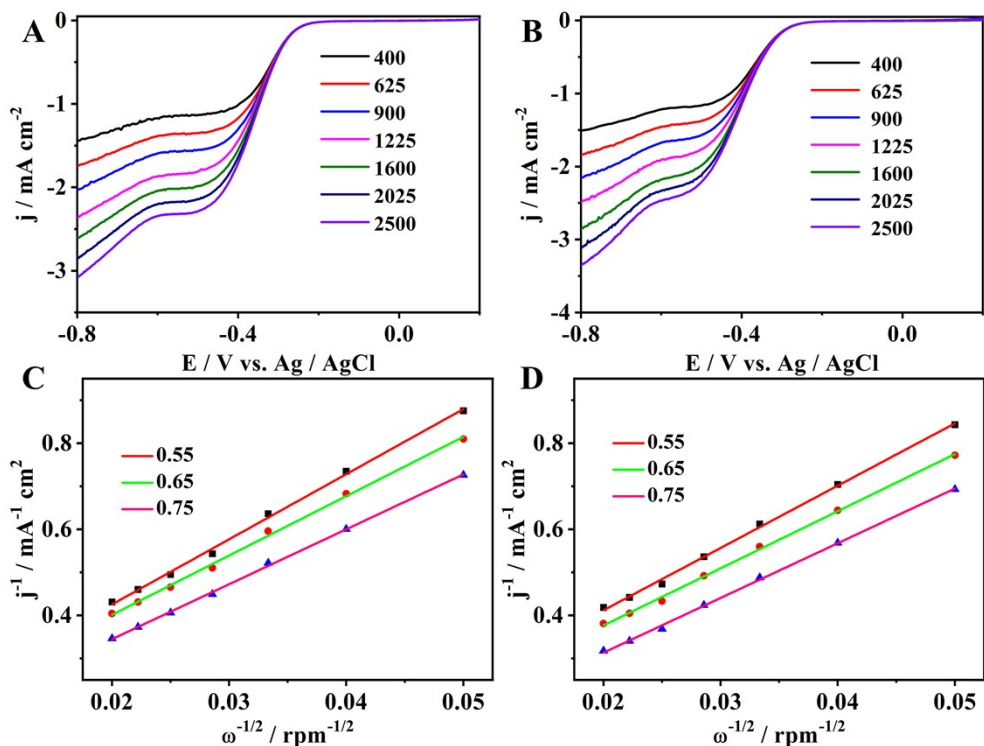

**Fig. S18** The ORR LSV curves and Koutecky–Levich plots of  $\text{Au}_{21}$  catalysis before (A, C) and after (B, D) addition of pyridine.

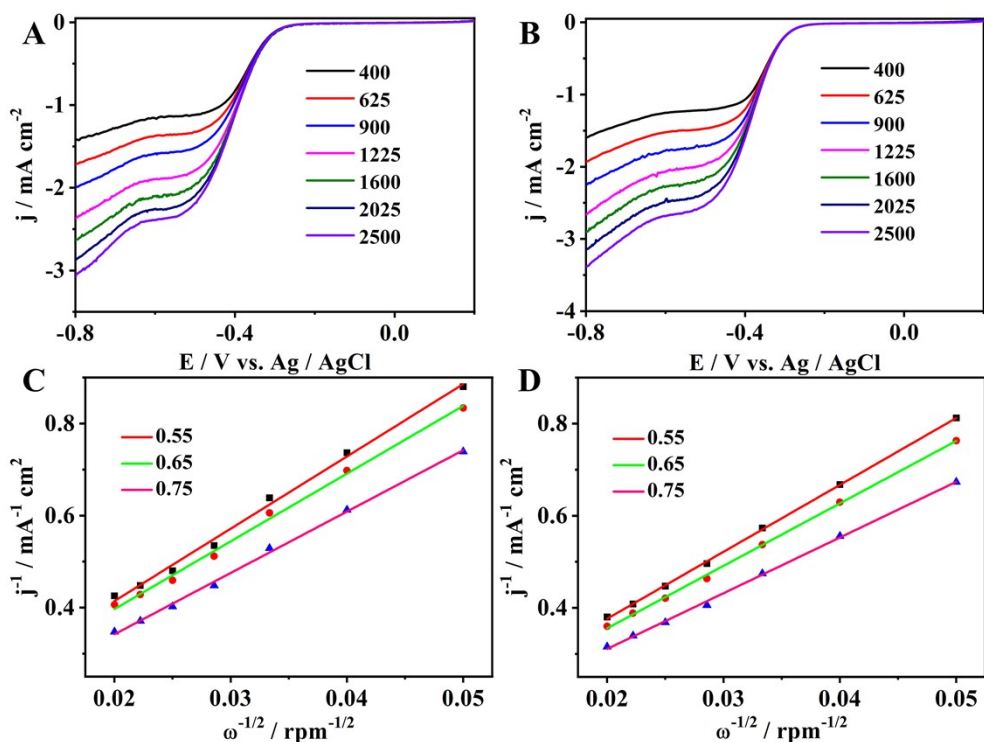

**Fig. S19** The ORR LSV curves and Koutecky–Levich plots of Au<sub>24</sub> catalysis before (A, C) and after (B, D) addition of pyridine.

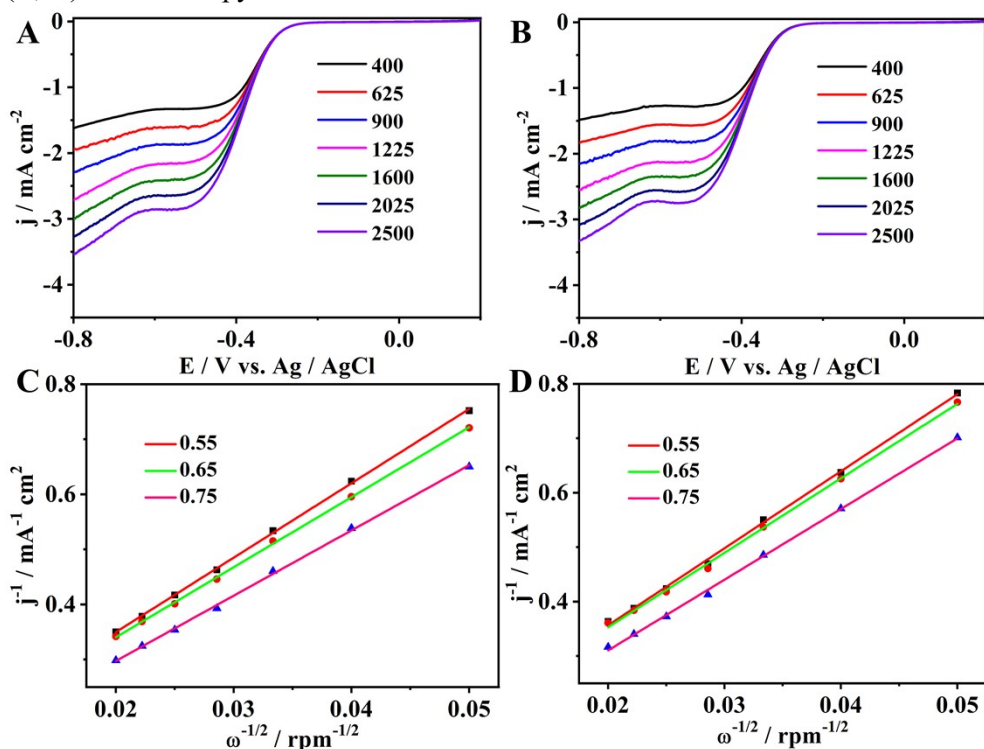

**Fig. S20** The ORR LSV curves and Koutecky–Levich plots of Au-P complex catalysis before (A, C) and after (B, D) addition of pyridine.

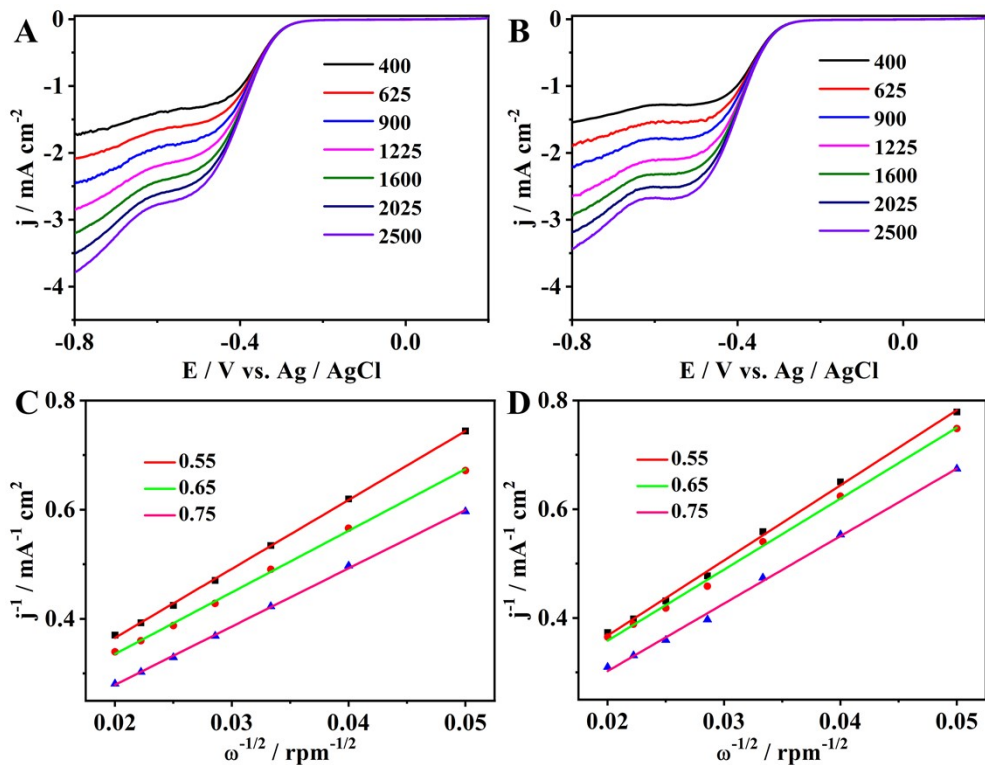

**Fig. S21** The ORR LSV curves and Koutecky–Levich plots of Au-S complex catalysis before (A, C) and after (B, D) addition of pyridine.

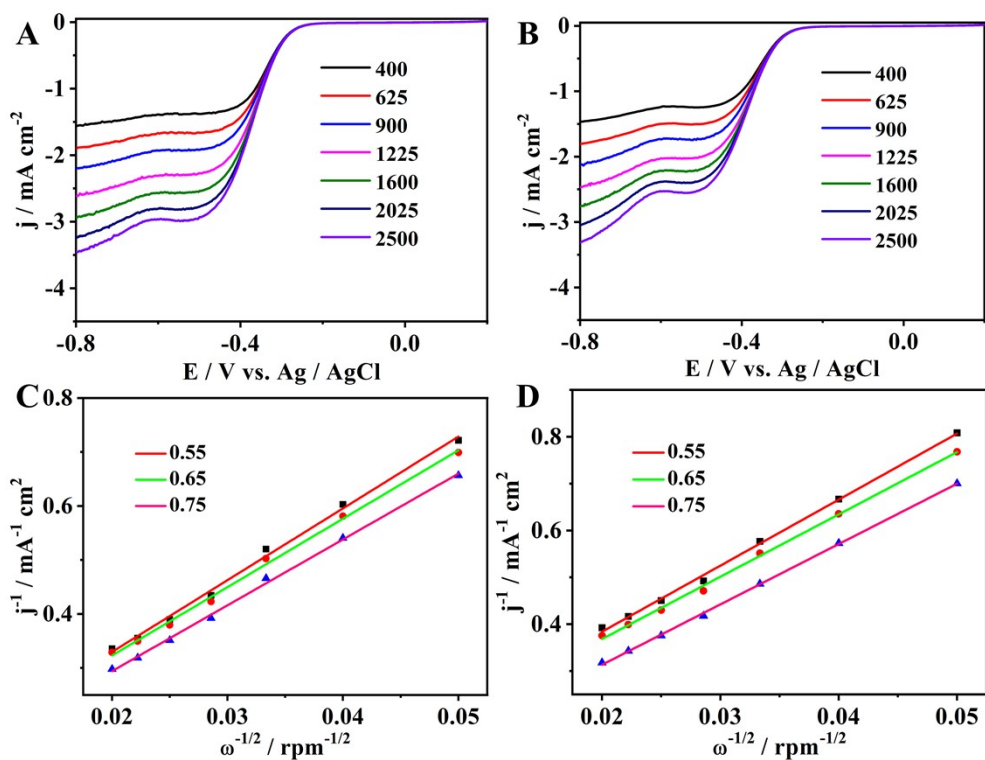

**Fig. S22** The ORR LSV curves and Koutecky–Levich plots of Cd-P complex catalysis before (A, C) and after (B, D) addition of pyridine.

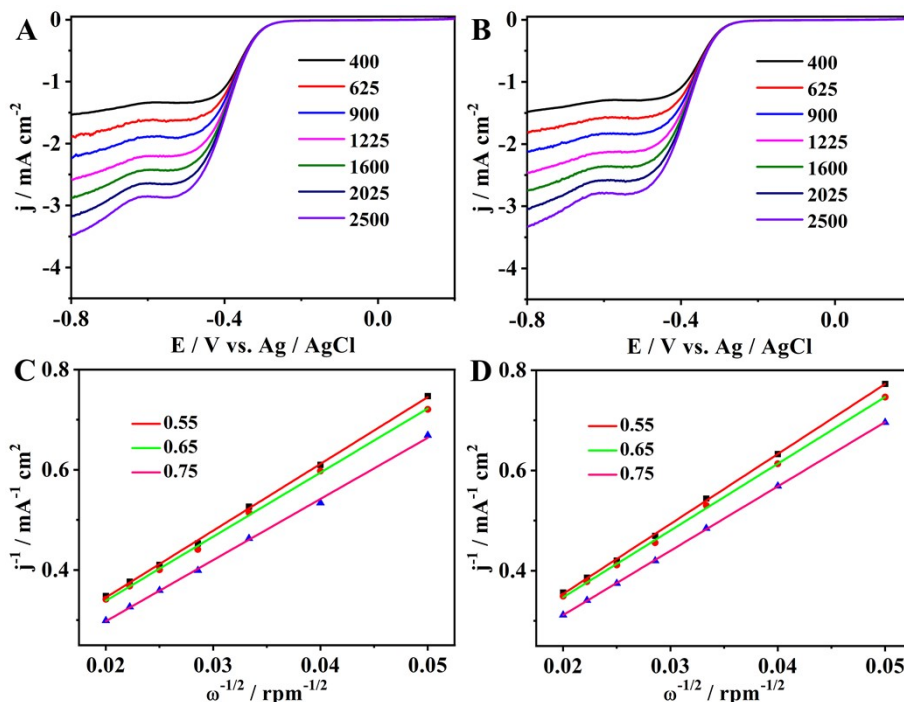

**Fig. S23** The ORR LSV curves and Koutecky–Levich plots of Cd-S complex catalysis before (A, C) and after (B, D) addition of pyridine.

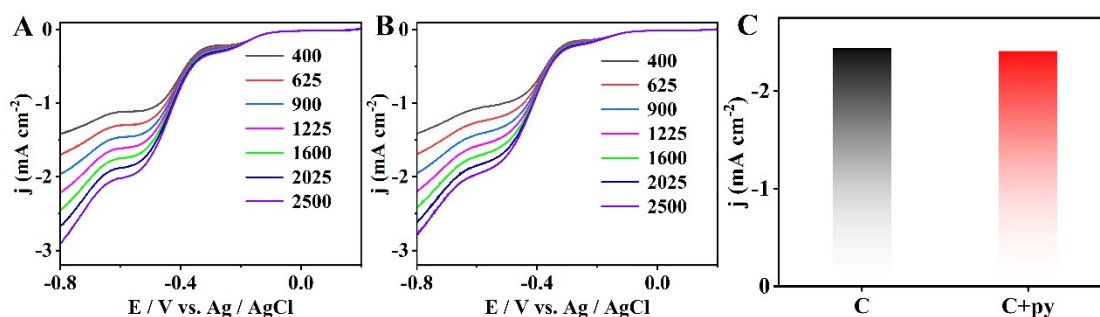

**Fig. S24** The ORR LSV curves of activated carbon before and after the addition of pyridine.

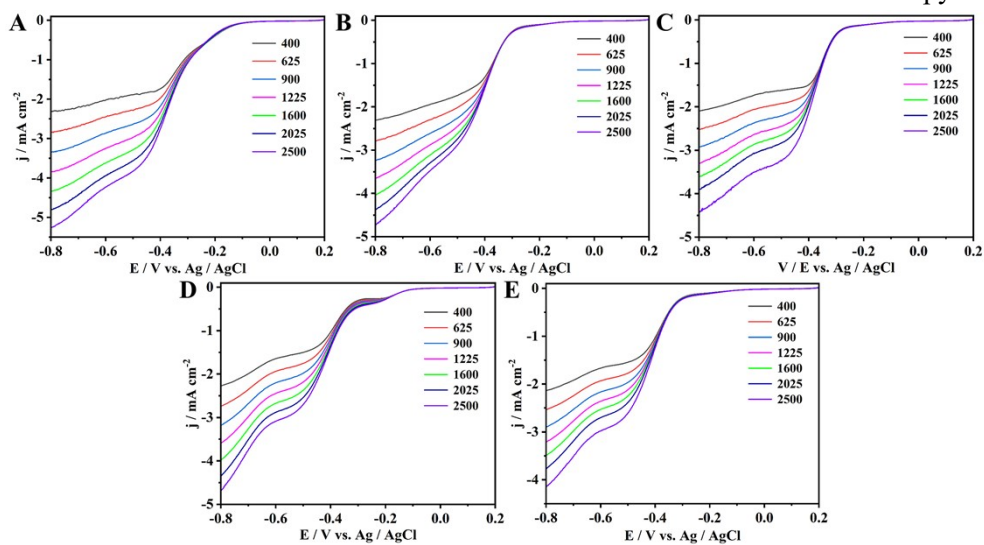

**Fig. S25** The ORR LSV curves of Au<sub>17</sub>Cd<sub>2</sub>@C after adding (A) Piperidine, (B) Pyrrolidine, (C) Piperazine, (D) Diethylamine, and (E) Triethylamine.

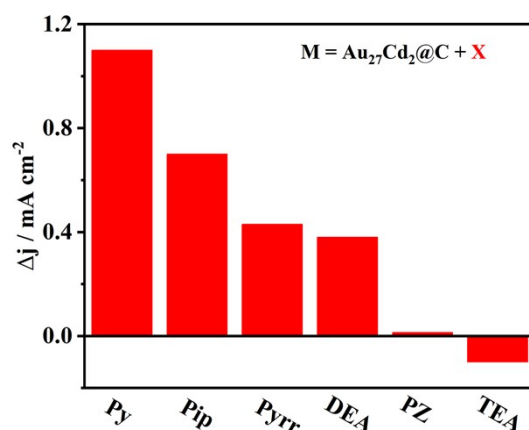

**Fig. S26** Bar chart of current density differences after adding different additives. (Py = Pyridine, Pip = Piperidine, Pyrr = Pyrrolidine, DEA = Diethylamine, PZ = Piperazine and TEA = Triethylamine).

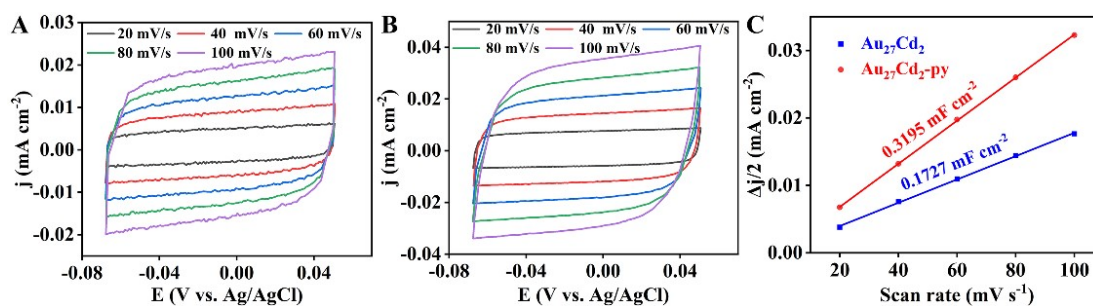

**Fig. S27** CV curves of (A)  $\text{Au}_{27}\text{Cd}_2$  and (B)  $\text{Au}_{27}\text{Cd}_2\text{-py}$  at different scan rates (20-100  $\text{mV s}^{-1}$ ) and (C) double-layer capacitance ( $C_{dl}$ ) of  $\text{Au}_{27}\text{Cd}_2$  and  $\text{Au}_{27}\text{Cd}_2\text{-py}$  measured in 0.5 M  $\text{K}_2\text{SO}_4$  solution with 0.1 M  $\text{NO}_3^-$ , where  $\Delta j/2 = (j_a - j_c)/2$  ( $j_a$  and  $j_c$  denote the anode and cathode current density).

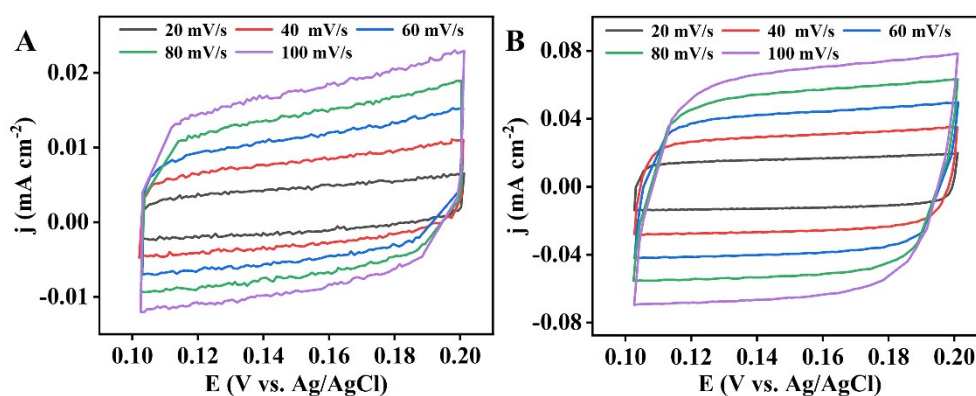

**Fig. S28** CV curves of (A)  $\text{Au}_{27}\text{Cd}_2@\text{C}$  and (B)  $\text{Au}_{27}\text{Cd}_2@\text{C-py}$  at different scan rates (20-100  $\text{mV s}^{-1}$ ).

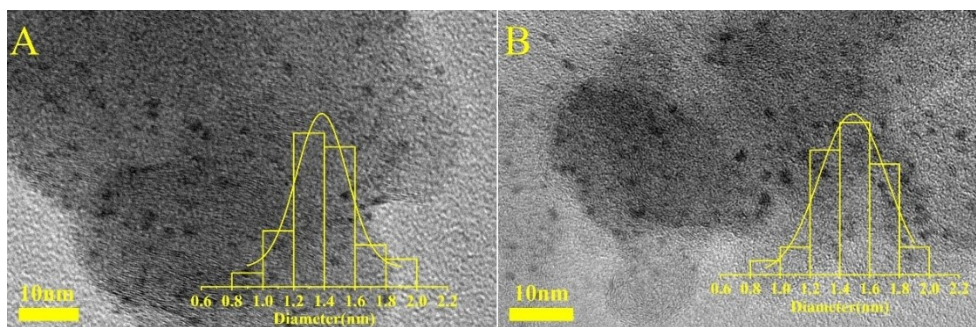

**Fig. S29** TEM and size distribution of  $\text{Au}_{27}\text{Cd}_2@\text{C}$  before (A) and after (B) tests.

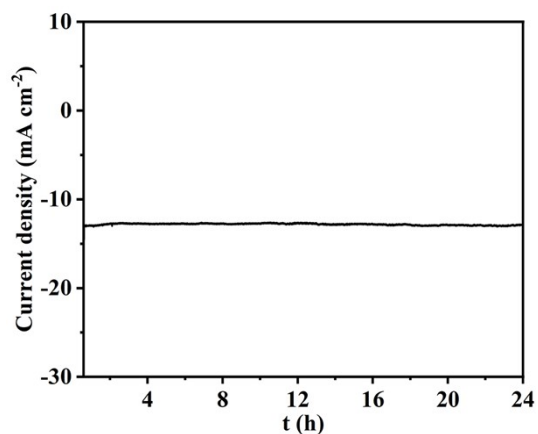

**Fig. S30** The Current-Time (IT) curve of  $\text{Au}_{27}\text{Cd}_2@\text{C}$  at -1.4V for 24 hours.

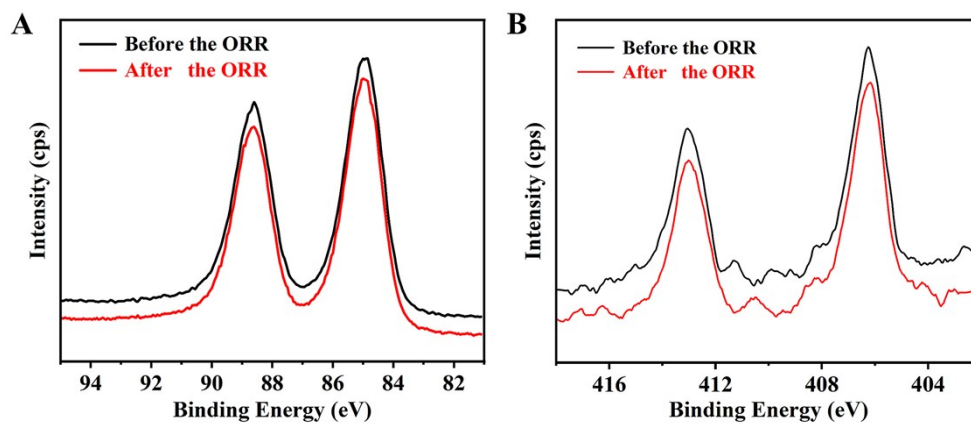

**Fig. S31** (A) Au 4f and (B) Cd 3d binding energy of  $\text{Au}_{27}\text{Cd}_2@\text{C}$  in XPS spectra, before and after the ORR reaction.

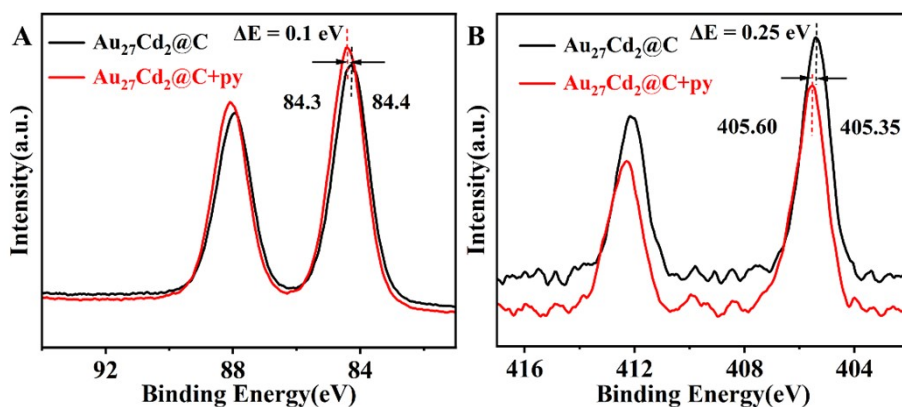

**Fig. S32** Changes of  $\text{Au}_{27}\text{Cd}_2@\text{C}$  XPS absorption peak before and after the addition of pyridine. (A) Au 4f and (B) Cd 3d.

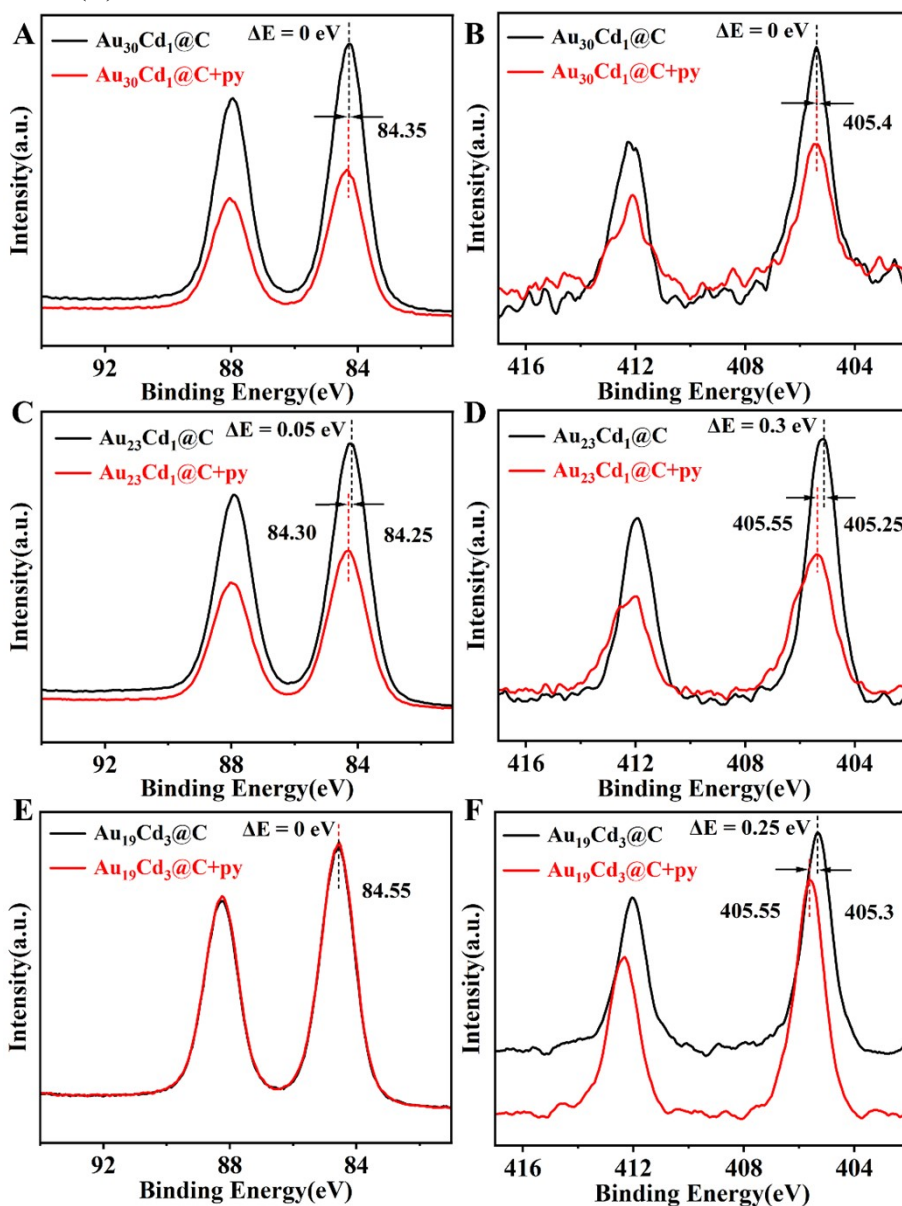

**Fig. S33** Changes of  $\text{Au}_{30}\text{Cd}_1@\text{C}$ ,  $\text{Au}_{23}\text{Cd}_1@\text{C}$ , and  $\text{Au}_{19}\text{Cd}_3@\text{C}$  XPS absorption peak before and after the addition of pyridine. (A) Au 4f and (B) Cd 3d of  $\text{Au}_{30}\text{Cd}_1$ , (C) Au 4f and (D) Cd 3d of  $\text{Au}_{23}\text{Cd}_1$ , (E) Au 4f and (F) Cd 3d of  $\text{Au}_{19}\text{Cd}_3$ .

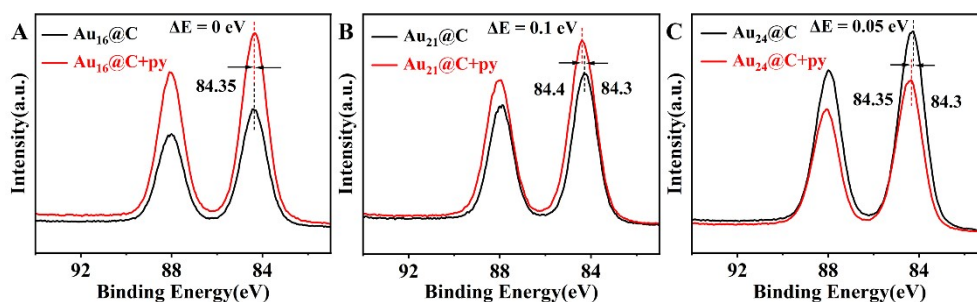

**Fig. S34** Changes of Au 4f XPS absorption peak in (A) Au<sub>16</sub>@C, (B) Au<sub>21</sub>@C, and (C) Au<sub>24</sub>@C before and after the addition of pyridine.

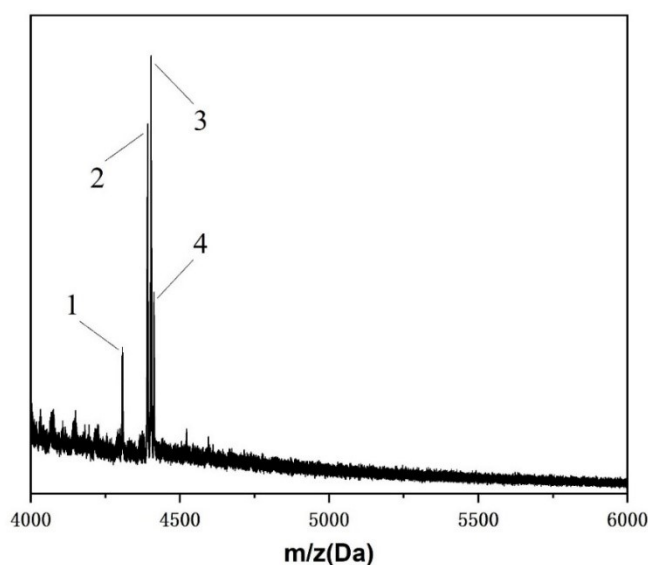

**Fig. S35** The total ESI-MS spectrum of Au<sub>27</sub>Cd<sub>2</sub> after the addition of pyridine. Signal peaks 1-4 are assigned to  $[\text{Au}_{27}\text{Cd}_2(\text{S-Adm})_{15}(\text{PPh}_2\text{Py})\text{Cl}+2\text{Cs}]^{2+}$ ,  $[\text{Au}_{27}\text{Cd}_2(\text{S-Adm})_{16}(\text{PPh}_2\text{Py})\text{Cl}+2\text{Cs}]^{2+}$ ,  $[\text{Au}_{27}\text{Cd}_2(\text{S-Adm})_{16}(\text{PPh}_2\text{Py})(\text{CH}_3\text{COO}^-)+2\text{Cs}]^{2+}$ ,  $[\text{Au}_{27}\text{Cd}_2(\text{S-Adm})_{16}(\text{PPh}_2\text{Py})(\text{Py})+2\text{Cs}]^{2+}$ .

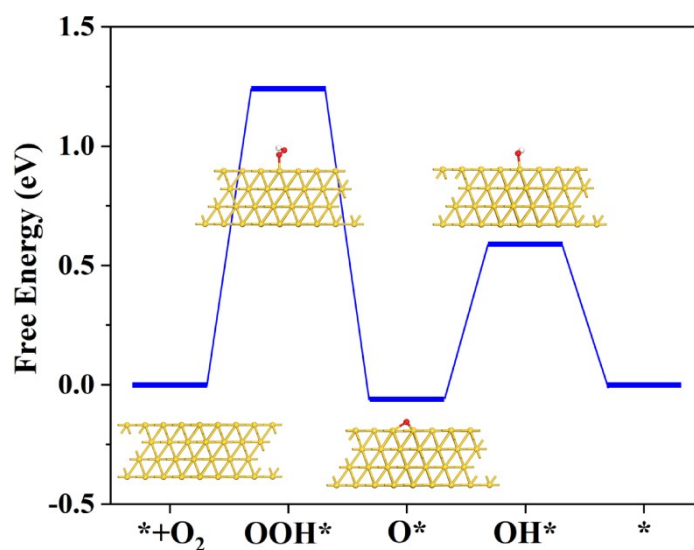

**Fig. S36** Free energy diagrams of ORR at Au(111) surfaces ( $U^0 = 1.23 \text{ V}$ ).

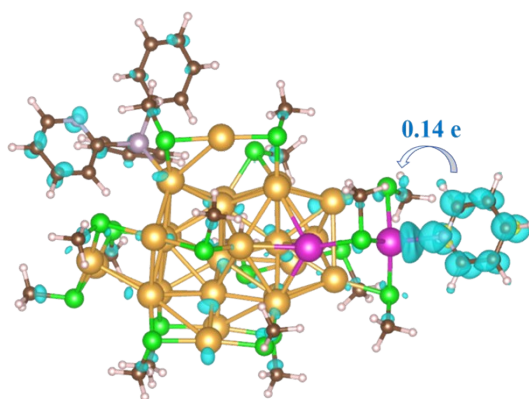

**Fig. S37** The charge differential density and Bader charge analysis of  $\text{Au}_{27}\text{Cd}_2$  nanostructures with pyridine modification.

**Table S5.** Calculated Gibbs free energies ( $G_{\text{ads}}^*$ ) for  $\text{OOH}^*$ ,  $\text{O}^*$ , and  $\text{OH}^*$ , including zero-point energy (ZPE) and entropy ( $T\Delta S$ ) corrections.

|                                       |                | E       | $T\Delta S$ | ZPE  | $G_{\text{ads}}^*$ |
|---------------------------------------|----------------|---------|-------------|------|--------------------|
|                                       | *              | -702.70 | /           | /    | /                  |
| $\text{Au}_{27}\text{Cd}_2$           | $\text{OH}^*$  | -712.51 | 0.36        | 0.64 | 1.35               |
|                                       | $\text{O}^*$   | -708.64 | 0.08        | 0.14 | 1.55               |
|                                       | $\text{OOH}^*$ | -716.77 | 0.37        | 0.87 | 4.74               |
|                                       | *              | -776.03 | /           | /    | /                  |
| $\text{Au}_{27}\text{Cd}_2\text{-py}$ | $\text{OH}^*$  | -786.01 | 0.20        | 0.70 | 1.41               |
|                                       | $\text{O}^*$   | -780.70 | 0.09        | 0.13 | 2.80               |
|                                       | $\text{OOH}^*$ | -790.31 | 0.31        | 0.85 | 4.57               |
| $\text{H}_2\text{O}$                  |                | -14.22  | 0.67        | 0.56 | /                  |
| $\text{H}_2$                          |                | -6.76   | 0.41        | 0.27 | /                  |

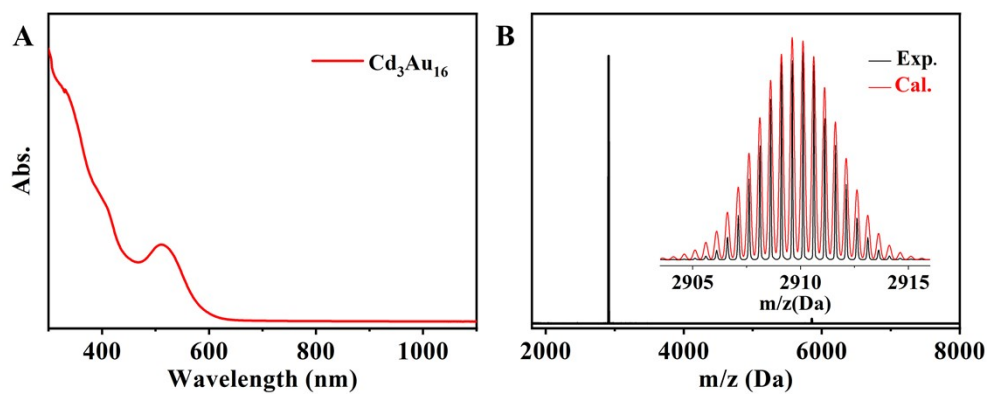

**Fig. S38** (A) UV-vis spectrum and (B) ESI-MS of  $\text{Au}_{16}\text{Cd}_3$ .

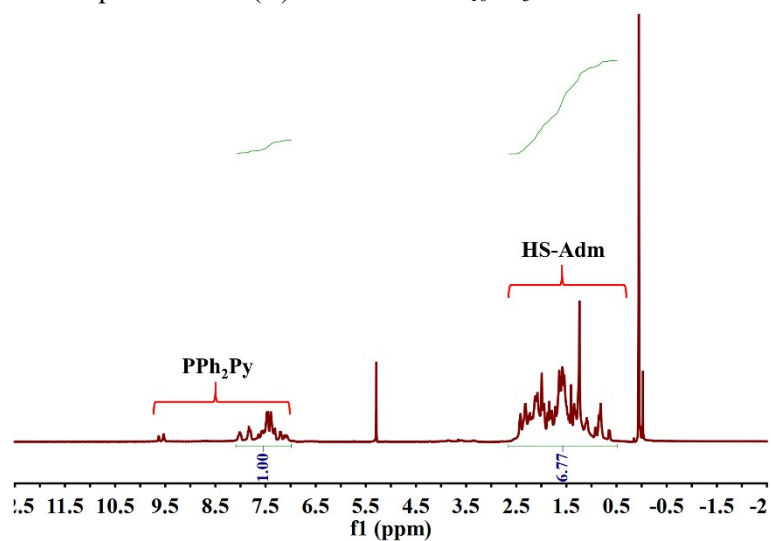

**Fig. S39**  $^1\text{H}$  NMR spectrum of the  $\text{Au}_{16}\text{Cd}_3$  cluster.

**Table S6.** CHN EA of the  $\text{Au}_{16}\text{Cd}_3$  cluster.

| Empirical formula                                                                                | C     | H  | N    |
|--------------------------------------------------------------------------------------------------|-------|----|------|
| $\text{C}_{141}\text{H}_{177}\text{Au}_{16}\text{Cd}_3\text{Cl}_3\text{N}_3\text{P}_3\text{S}_9$ | 28.7% | 3% | 0.7% |

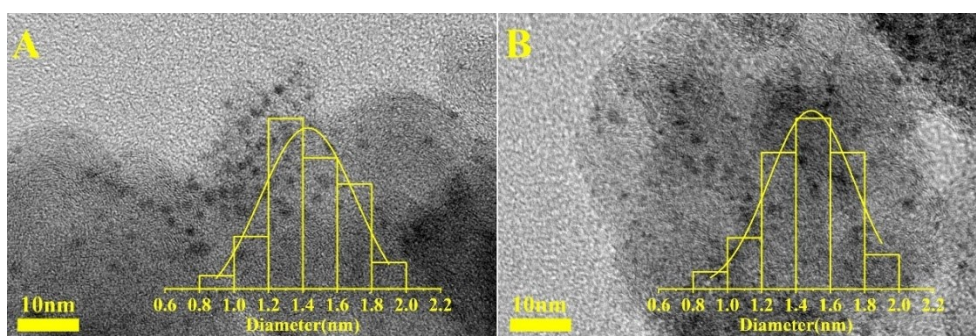

**Fig. S40** TEM and size distribution of  $\text{Au}_{16}\text{Cd}_3@\text{C}$  before (A) and after (B) tests.

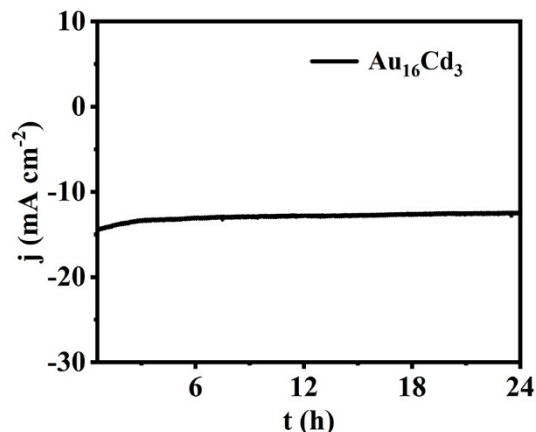

**Fig. S41.** The IT curves of  $\text{Au}_{16}\text{Cd}_3@C$  (F) at  $-1.4\text{V}$  for 24 hours.

**Table S7.** Crystal data and structure refinement for  $\text{Au}_{16}\text{Cd}_3$ .

|                                               |                                                                                                  |
|-----------------------------------------------|--------------------------------------------------------------------------------------------------|
| CCDC code                                     | 2381500                                                                                          |
| Empirical formula                             | $\text{C}_{141}\text{H}_{177}\text{Au}_{16}\text{Cd}_3\text{Cl}_3\text{N}_3\text{P}_3\text{S}_9$ |
| Formula weight                                | 5890.31                                                                                          |
| Temperature/K                                 | 120.0                                                                                            |
| Crystal system                                | triclinic                                                                                        |
| Space group                                   | P-1                                                                                              |
| $a/\text{\AA}$                                | 16.8145(4)                                                                                       |
| $b/\text{\AA}$                                | 17.0639(4)                                                                                       |
| $c/\text{\AA}$                                | 31.7354(8)                                                                                       |
| $\alpha/^\circ$                               | 82.183(2)                                                                                        |
| $\beta/^\circ$                                | 84.464(2)                                                                                        |
| $\gamma/^\circ$                               | 63.191(2)                                                                                        |
| Volume/ $\text{\AA}^3$                        | 8045.0(4)                                                                                        |
| Z                                             | 2                                                                                                |
| $\rho_{\text{calc}}/\text{g/cm}^3$            | 2.432                                                                                            |
| $\mu/\text{mm}^{-1}$                          | 31.903                                                                                           |
| F(000)                                        | 5384.0                                                                                           |
| Crystal size/ $\text{mm}^3$                   | $0.1 \times 0.07 \times 0.05$                                                                    |
| Radiation                                     | $\text{CuK}\alpha$ ( $\lambda = 1.54186$ )                                                       |
| $2\Theta$ range for data collection/ $^\circ$ | 6.436 to 132                                                                                     |
| Index ranges                                  | $-19 \leq h \leq 11, -20 \leq k \leq 16, -37 \leq l \leq 32$                                     |
| Reflections collected                         | 59840                                                                                            |
| Independent reflections                       | 26940 [ $R_{\text{int}} = 0.0694, R_{\text{sigma}} = 0.1123$ ]                                   |
| Data/restraints/parameters                    | 26940/1152/1603                                                                                  |
| Goodness-of-fit on $F^2$                      | 0.939                                                                                            |
| Final R indexes [ $I \geq 2\sigma(I)$ ]       | $R_1 = 0.0729, wR_2 = 0.1781$                                                                    |
| Final R indexes [all data]                    | $R_1 = 0.1010, wR_2 = 0.1914$                                                                    |
| Largest diff. peak/hole / $e \text{\AA}^{-3}$ | 5.64/-5.17                                                                                       |

### Supporting references

1. C. Yao, C. Q. Xu, I. H. Park, M. Zhao, Z. Zhu, J. Li, X. Hai, H. Fang, Y. Zhang, G. Macam, J. Teng, L. Li, Q. H. Xu, F. C. Chuang, J. Lu, C. Su, J. Li and J. Lu, *Angew. Chem. Int. Ed.*, 2020, **59**, 8270-8276.
2. Y. Tan, Y. Lv, L. Xu, Q. Li, J. Chai, S. Yang, H. Yu and M. Zhu, *J. Am. Chem. Soc.*, 2023, **145**, 4238–4245.
3. S. Yang, S. Chen, L. Xiong, C. Liu, H. Yu, S. Wang, N. L. Rosi, Y. Pei and M. Zhu, *J. Am. Chem. Soc.*, 2018, **140**, 10988–10994.
4. S. Chen, L. Xiong, S. Wang, Z. Ma, S. Jin, H. Sheng, Y. Pei and M. Zhu, *J. Am. Chem. Soc.*, 2016, **138**, 10754–10757.
5. D. Crasto, G. Barcaro, M. Stener, L. Sementa, A. Fortunelli and A. Dass, *J. Am. Chem. Soc.*, 2014, **136**, 14933–14940.
6. G. Kresse and J. Hafner, *Phys. Rev. B* 1993, **48**, 13115–13118.
7. P. E. Blöchl, *Phys. Rev. B* 1994, **50**, 17953-17979.
8. J. P. Perdew, K. Burke and M. Ernzerhof, *Phys. Rev. Lett.* 1996, **77**, 3865–3868.
9. Grimme, *J. Comput. Chem.* 2006, **27**, 1787–1799.
10. K. Mathew, R. Sundararaman, K. Letchworth-Weaver, T. A. Arias and R. G. Hennig, *J. Chem. Phys.* 2014, **140**, 84–106.
11. I. C. Man, H. Y. Su, F. Calle-Vallejo, H. A. Hansen, J. I. Martínez, N. G. Inoglu, J. Kitchin, T. F. Jaramillo, J. K. Nørskov and J. Rossmeisl, *ChemCatChem* 2011, **3**, 1159–1165.
